# Supplementary material for: Target proteins reprogrammed by As and As + Si treatments in Solanum lycopersicum L. fruit
Source: PubMed Central journal article supplement (PMC5696772; doi:10.1186/s12870-017-1168-2), 2017-11-21

**Figure S1: Scatter plot of detected spots on 2D gel: a) Aragon, and b) Gladis**

Scatter plot of the spots captured in 2D gel corresponding to differentially abundant fruit proteins when comparing treatments in pairs.

X axis value = intensity % in condition i

Y axis value = intensity % in condition j

Pink band: comprises points whose differential abundance in conditions i and j is less than the fixed threshold ( $p < 0.05$ ).

Points outside the gray bands represent the proteins chosen for further MS fingerprinting.

A

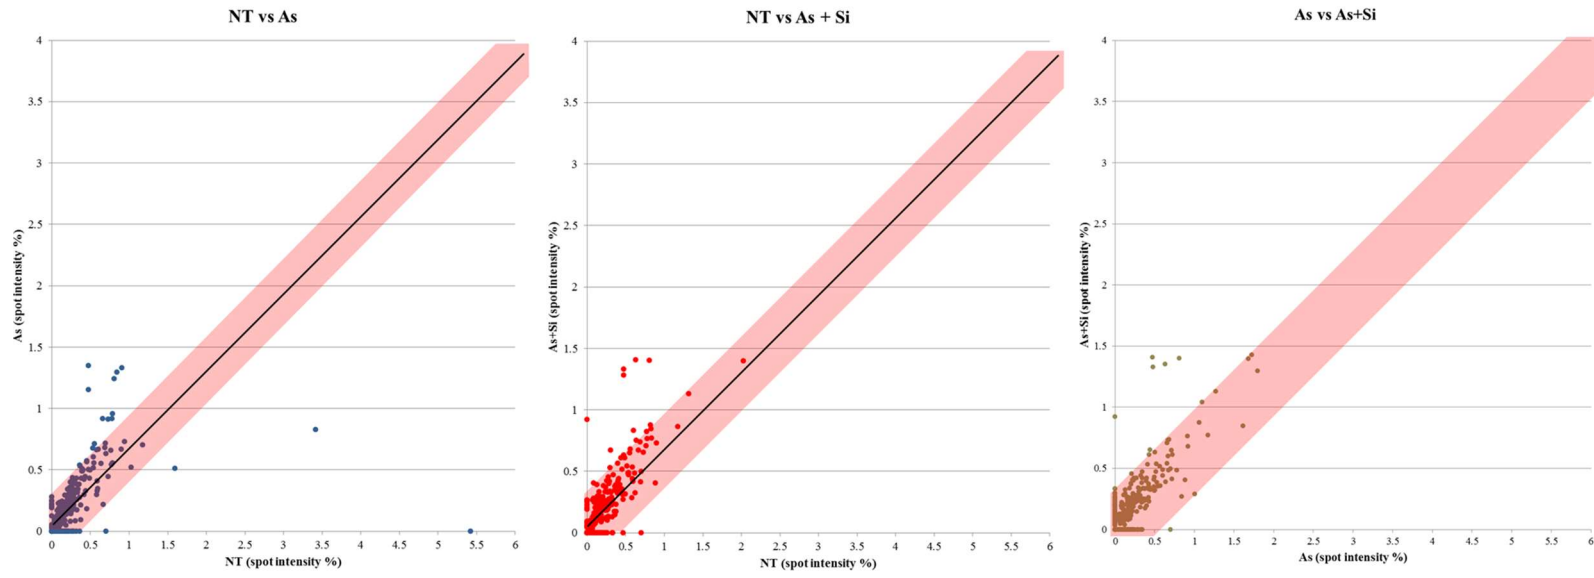

B

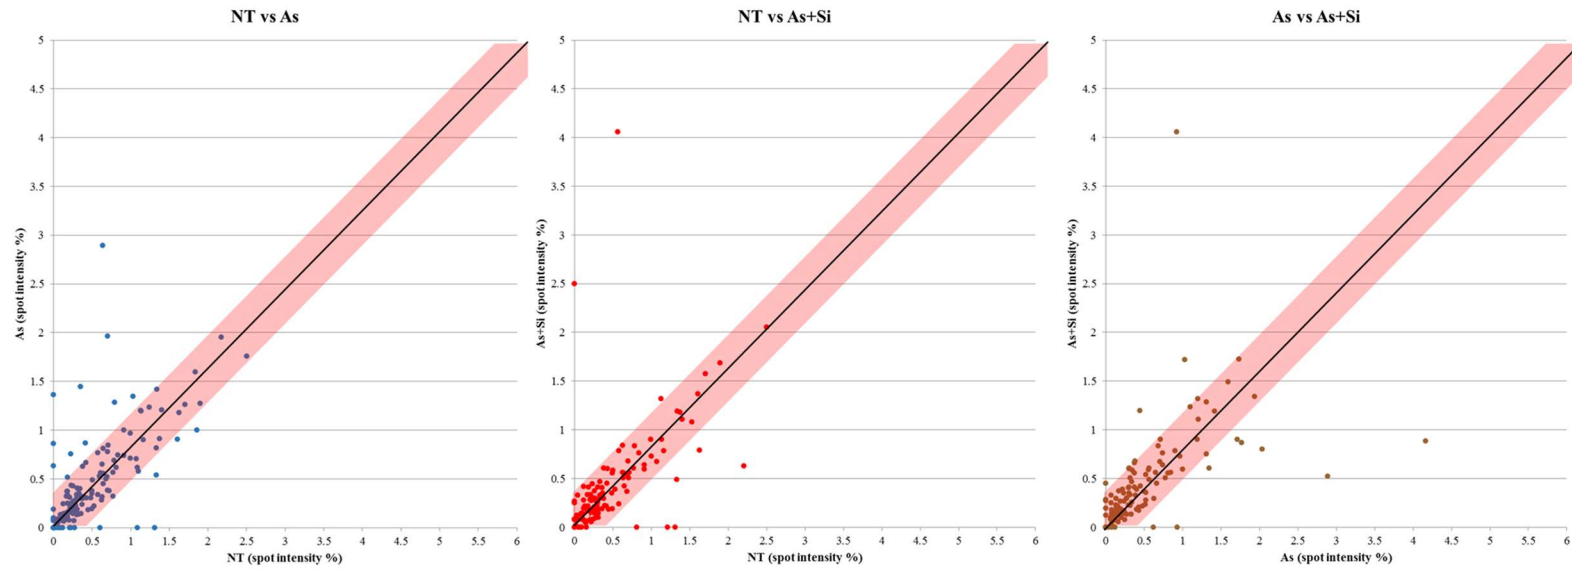

Supplement: 12870_2017_1168_MOESM1_ESM.pdf [file 12870_2017_1168_MOESM1_ESM.pdf]
