# Supplementary material for: Target proteins reprogrammed by As and As + Si treatments in Solanum lycopersicum L. fruit
Source: PubMed Central journal article supplement (PMC5696772; doi:10.1186/s12870-017-1168-2), 2017-11-21
Supplement: 12870_2017_1168_MOESM7_ESM.pdf [file 12870_2017_1168_MOESM7_ESM.pdf]

Figure S4. Differentially abundant fruit proteins involved in the “Biotic Stress” response MapMan pathway.

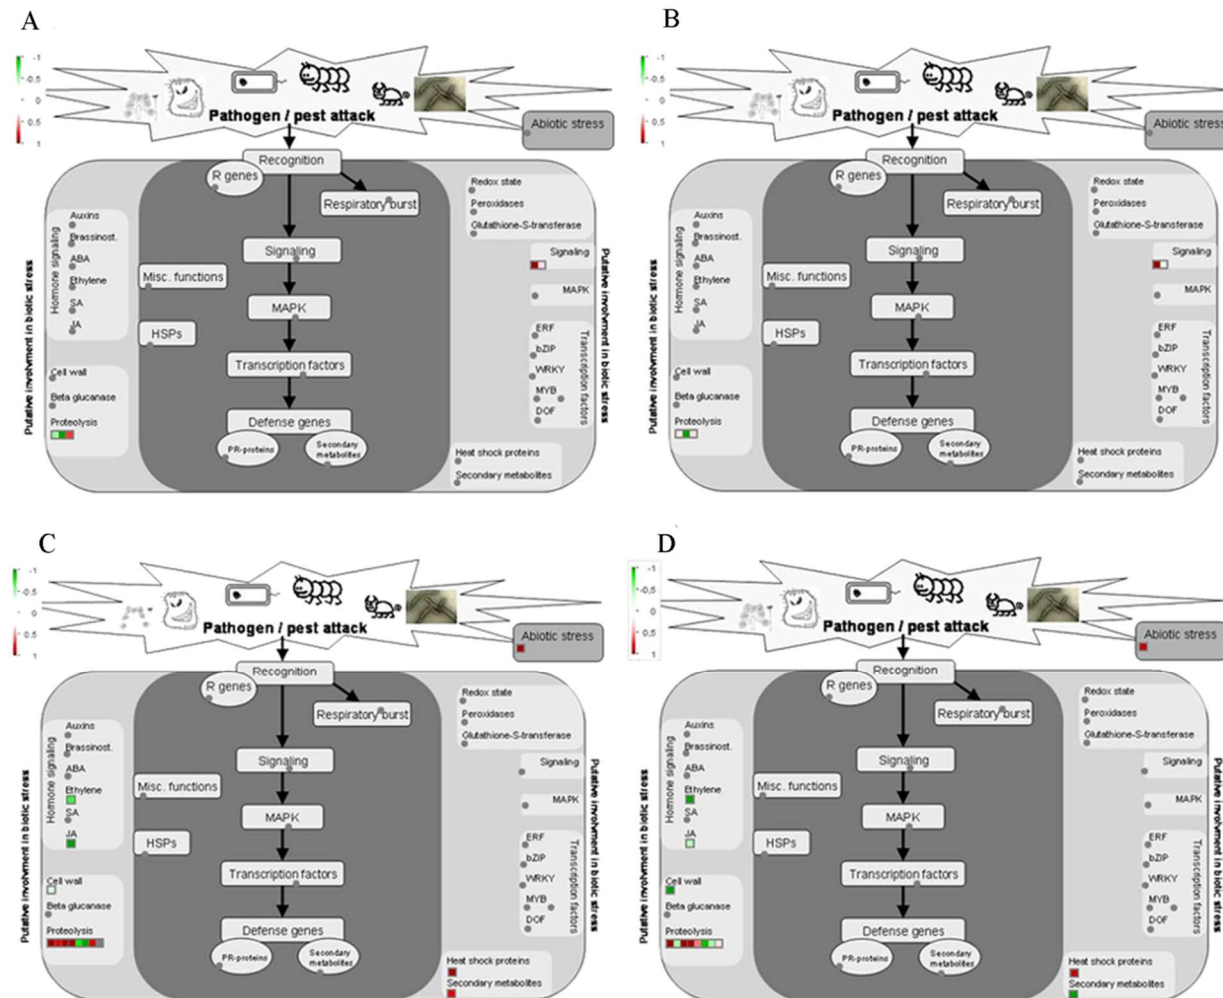

A, C: response to the As treatment; B, D response to the As+Si treatment, for (A, B) cv. Aragon and (C, D) cv. Gladis. Proteins more and less abundant in the treated compared to the non-treated plants are shown in shades of, respectively, red and green. Absent proteins are represented in grey.
