# Supplementary material for: Target proteins reprogrammed by As and As + Si treatments in Solanum lycopersicum L. fruit
Source: PubMed Central journal article supplement (PMC5696772; doi:10.1186/s12870-017-1168-2), 2017-11-21
Supplement: 12870_2017_1168_MOESM8_ESM.pdf [file 12870_2017_1168_MOESM8_ESM.pdf]

Figure S5. Differentially abundant fruit proteins in Gladiis involved in the “Ubiquitin Dependent Degradation” MapMan.

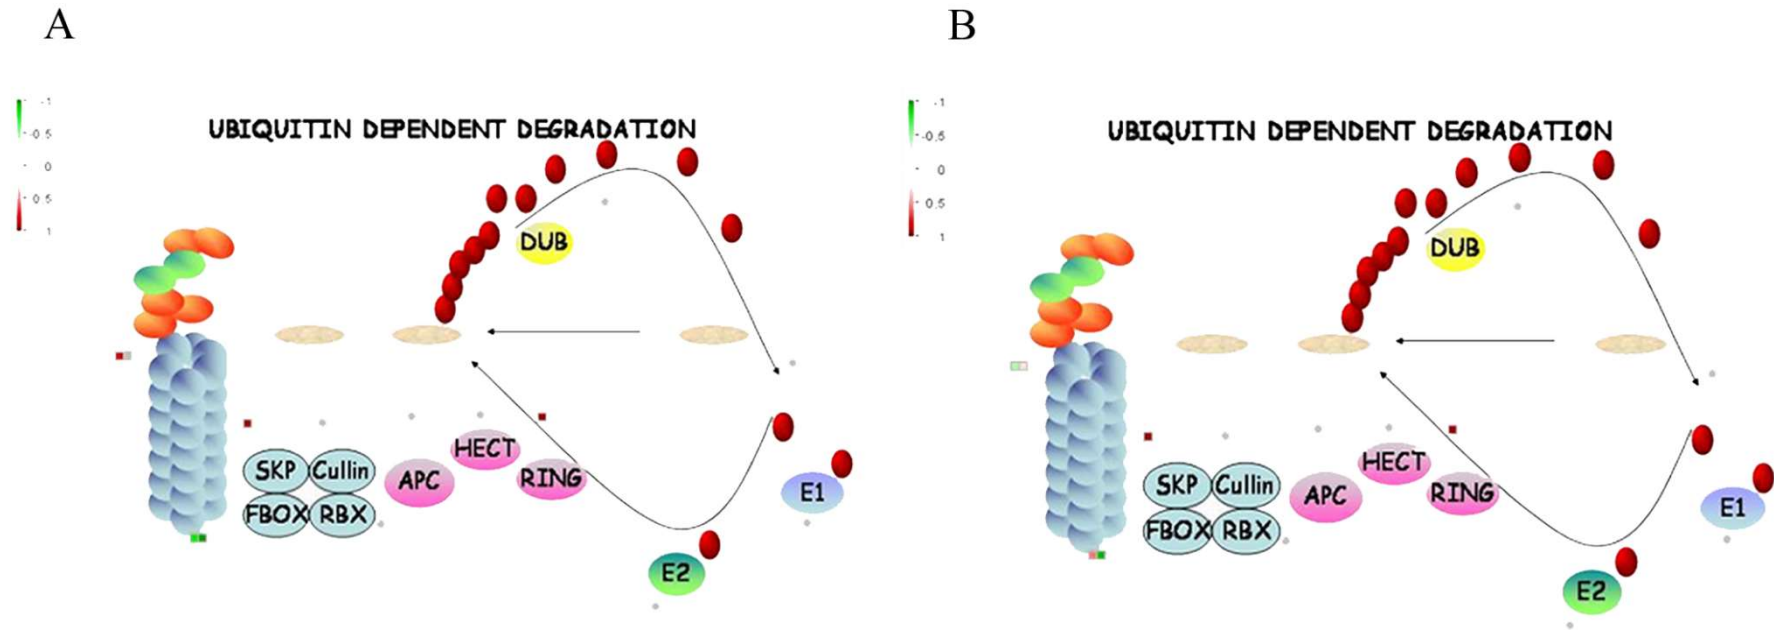

Response to A) As or B) As+Si treatments. Proteins more and less abundant in the treated compared to the non-treated plants are shown in shades of, respectively, *red* and *green*. Absent proteins are represented in *grey*.
